# Supplementary material for: Direct Mechanical Thrombectomy Versus Prior Bridging Intravenous Thrombolysis in Acute Ischemic Stroke: A Systematic Review and Meta-Analysis
Source: MDPI journal article supplement (doi:10.3390/life13010185), 2023-01-09

## ***Data Supplement***

**Table S1.** Search strategies

| Database                                  | Search Algorithm                                                                                                                                                                                                                                                                                                                                                                                                                                                                                                                                                                                                                                                                                                                                                                                                             |
|-------------------------------------------|------------------------------------------------------------------------------------------------------------------------------------------------------------------------------------------------------------------------------------------------------------------------------------------------------------------------------------------------------------------------------------------------------------------------------------------------------------------------------------------------------------------------------------------------------------------------------------------------------------------------------------------------------------------------------------------------------------------------------------------------------------------------------------------------------------------------------|
| PubMed,<br>EMBASE,<br>Scopus,<br>Cochrane | <ol style="list-style-type: none"><li>1. exp Mechanical Thrombolysis/</li><li>2. ((mechanical or endovascular) adj2 (treat* or thromb* or (clot adj2 disrupt*))).ti,ab.</li><li>3. exp Stents/</li><li>4. (stent* or Trevo or Merci or Penumbra).ti,ab.</li><li>5. 1 or 2 or 3 or 4</li><li>6. exp Stroke/</li><li>7. ((brain or cerebr* or subcortical or hemispher* or arter* or lacunar) adj2 infarct*).ti,ab.</li><li>8. (stroke* or apoplex* or ((brain or cerebrovascular) adj2 (attack or injury or accident* or insult*)) or CVA).ti,ab.</li><li>9. 6 or 7 or 8</li><li>10. exp Brain Ischemia/</li><li>11. ((brain or cerebral or hypoxia) adj2 ischem*).ti,ab.</li><li>12. (ischem* adj2 (encephalopath* or attack* or stroke*)).ti,ab.</li><li>13. 10 or 11 or 12</li><li>14. exp Thrombolytic Therapy/</li></ol> |

15. ((throm\* or fibrinolytic) adj2 therap\*).ti,ab.
16. exp Fibrinolysis/
17. fibrinoly\*.ti,ab.
18. exp Plasminogen Activators/
19. (plasminogen adj2 activat\*).ti,ab.
20. (bridg\* or anistreplase or alteplase or tPA or rt-PA).ti,ab.
21. exp Antithrombins/
22. (antithrombin\* or (thrombin adj2 inhibitor\*)).ti,ab.
23. 14 or 15 or 16 or 17 or 18 or 19 or 20 or 21 or 22
24. exp Hemorrhage/
25. (hemorrhag\* or bleed\*).ti,ab.
26. exp Long Term Adverse Effects/
27. ((adverse or side or undesir\* or negat\*) adj2 (impact\* or effect\* or reaction\* or event\* or outcome\*)).ti,ab.
28. exp Mortality/
29. (mortalit\* or ((death or fatal\*) adj2 rate\*)).ti,ab.
30. exp Safety/
31. (safe\* or tolerab\* or inciden\* or predict\* or prognos\* or course\*).ti,ab.
32. 24 or 25 or 26 or 27 or 28 or 29 or 30 or 31
33. 5 and 9 and 13 and 23 and 32

**Figure S1.** Risk of bias of included RCTs.

| Risk of Bias Domain<br>Study | The Randomization Process | Deviations From Intended Interventions | Missing Outcome Data | Measurement of The Outcome | Selection of The Reported Result | Overall Risk of Bias |
|------------------------------|---------------------------|----------------------------------------|----------------------|----------------------------|----------------------------------|----------------------|
| Yang P. et al. (2020)        | +                         | ×                                      | +                    | +                          | +                                | ×                    |
| Zi W. et al. (2021)          | +                         | +                                      | +                    | +                          | +                                | +                    |
| Suzuki K. et al. (2021)      | +                         | ?                                      | +                    | +                          | +                                | ?                    |
| LeCouffe N. E. et al. (2021) | +                         | +                                      | +                    | +                          | +                                | +                    |

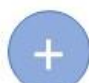

Low Risk

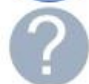

Some Concerns

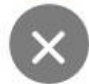

High Risk

**Figure S2.** Risk of bias of included observational studies.

| Risk of Bias Domain<br>Study  | Confounding | Selection of<br>Participants<br>Into the<br>Study | Deviations<br>From<br>Intended<br>Interventions | Classification<br>of<br>Interventions | Missing<br>Data | Measurement<br>of Outcomes | Selection of<br>The Reported<br>Result | Overall<br>Risk of<br>Bias |
|-------------------------------|-------------|---------------------------------------------------|-------------------------------------------------|---------------------------------------|-----------------|----------------------------|----------------------------------------|----------------------------|
| Broeg-Morvay A. et al. (2016) | —           | +                                                 | +                                               | +                                     | +               | +                          | +                                      | +                          |
| Gong L. et al. (2019)         | —           | +                                                 | +                                               | +                                     | +               | —                          | —                                      | —                          |
| Weber R. et al. (2017)        | —           | +                                                 | +                                               | +                                     | +               | —                          | —                                      | —                          |
| Wang H. et al. (2017)         | —           | +                                                 | +                                               | +                                     | +               | +                          | +                                      | +                          |
| Bellwald S. et al. (2017)     | +           | +                                                 | +                                               | +                                     | +               | +                          | +                                      | +                          |
| Cappellari M. et al. (2021)   | —           | +                                                 | +                                               | +                                     | +               | —                          | —                                      | —                          |
| Du M. (2021)                  | +           | +                                                 | +                                               | +                                     | +               | —                          | —                                      | +                          |
| Pienimäki J. P. et al. (2021) | —           | +                                                 | +                                               | +                                     | +               | +                          | +                                      | +                          |
| Tong X. et al. (2021)         | +           | +                                                 | +                                               | +                                     | —               | —                          | —                                      | —                          |

Low Risk  
 Moderate Risk  
 Serious Risk

**Figure S3.** Drapery plot of comparison of sICH between direct mechanical thrombectomy and bridge therapy in the anterior group.

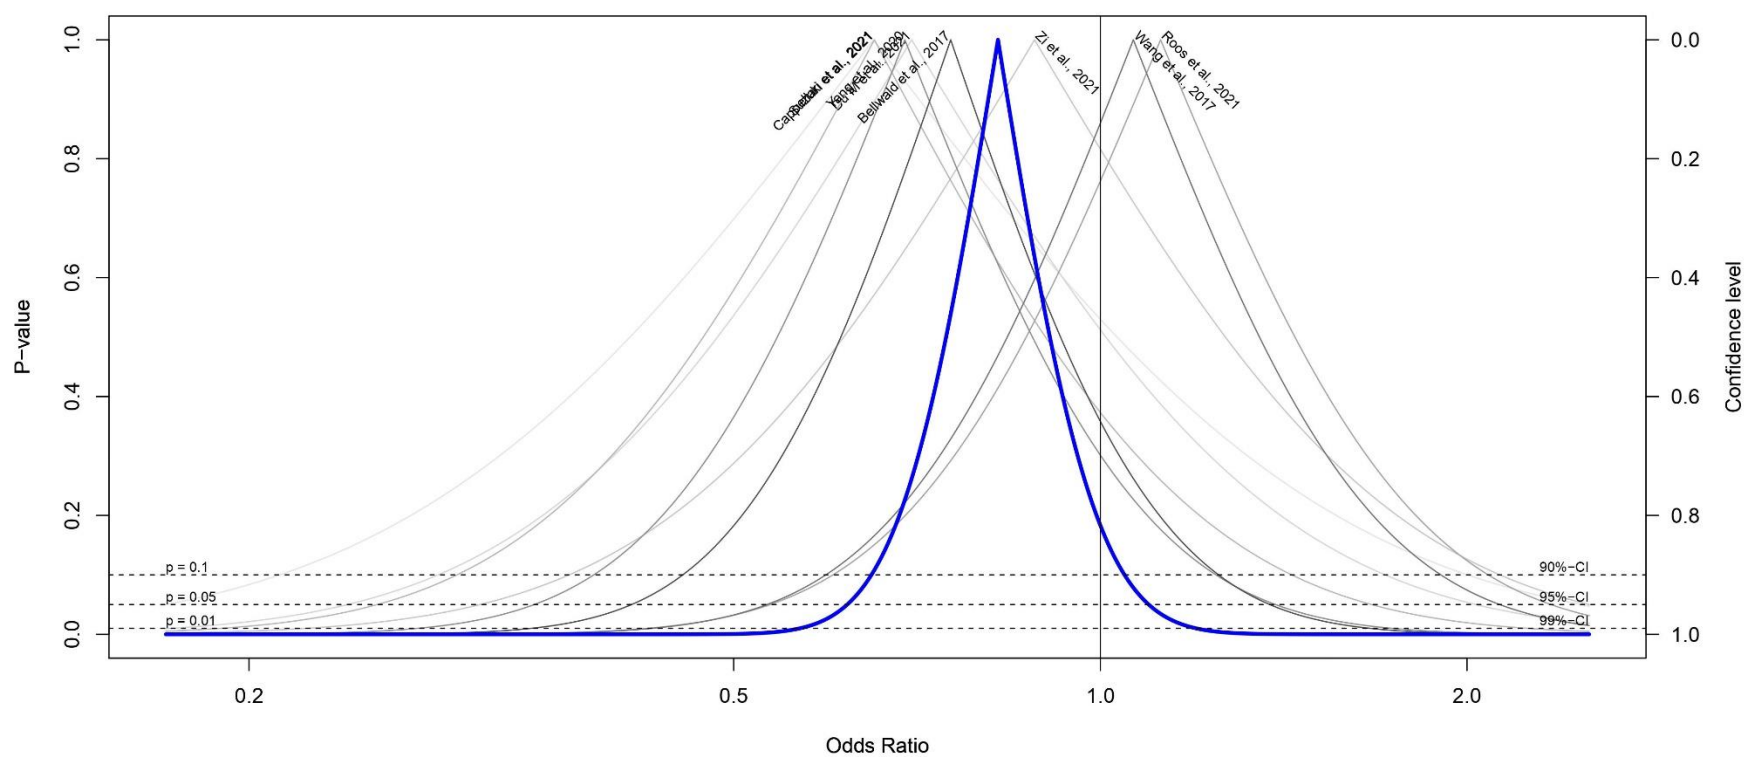

**Figure S4.** Drapery plot of comparison of mortality at 90 days between direct mechanical thrombectomy and bridge therapy in the anterior group.

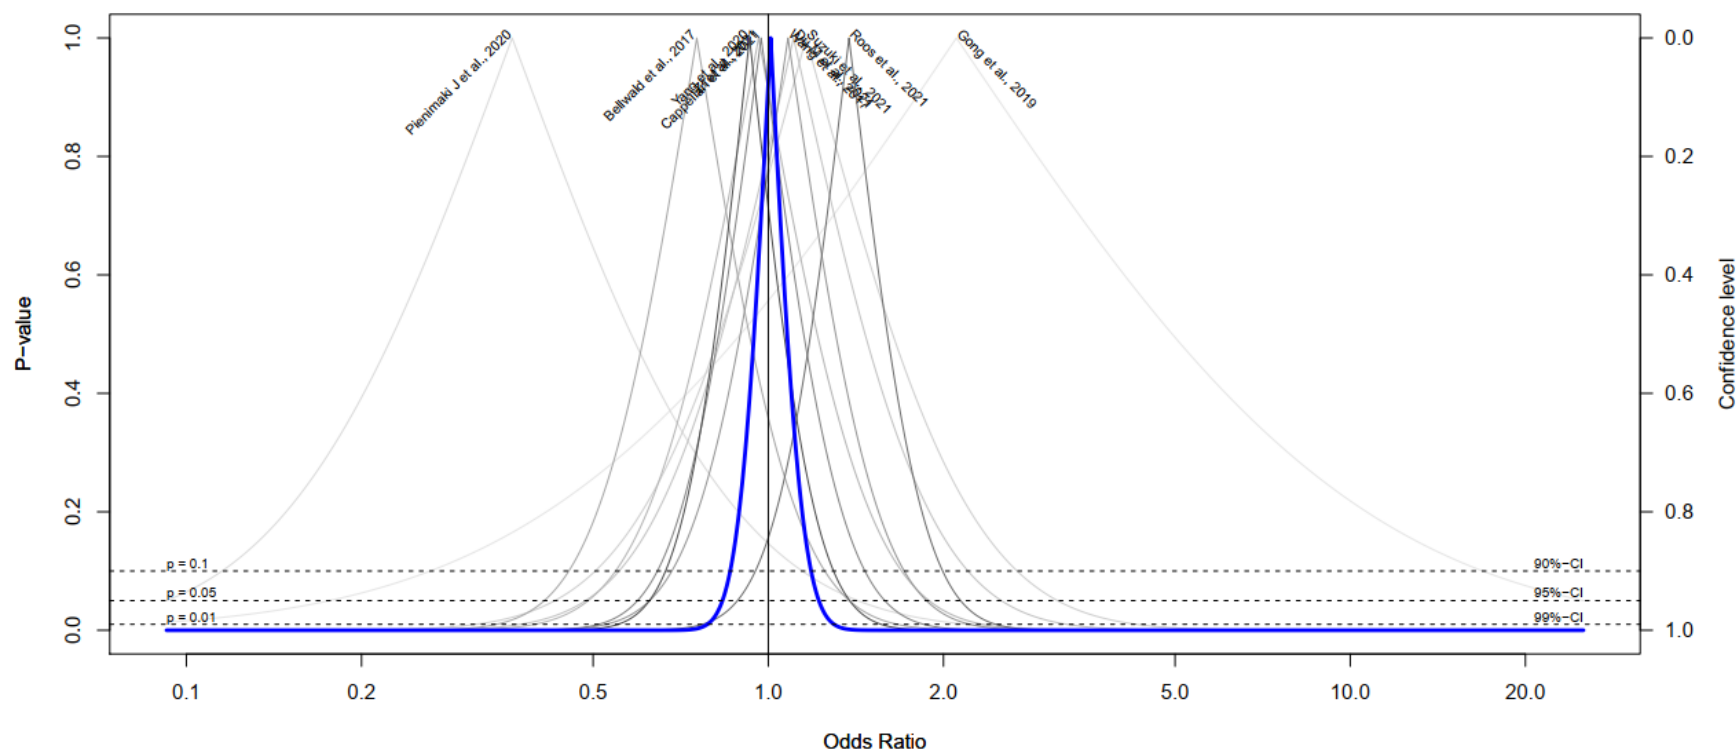

**Figure S5.** Drapery plot of comparison of good functional outcome at 90 days between direct mechanical thrombectomy and bridge therapy in the anterior group.

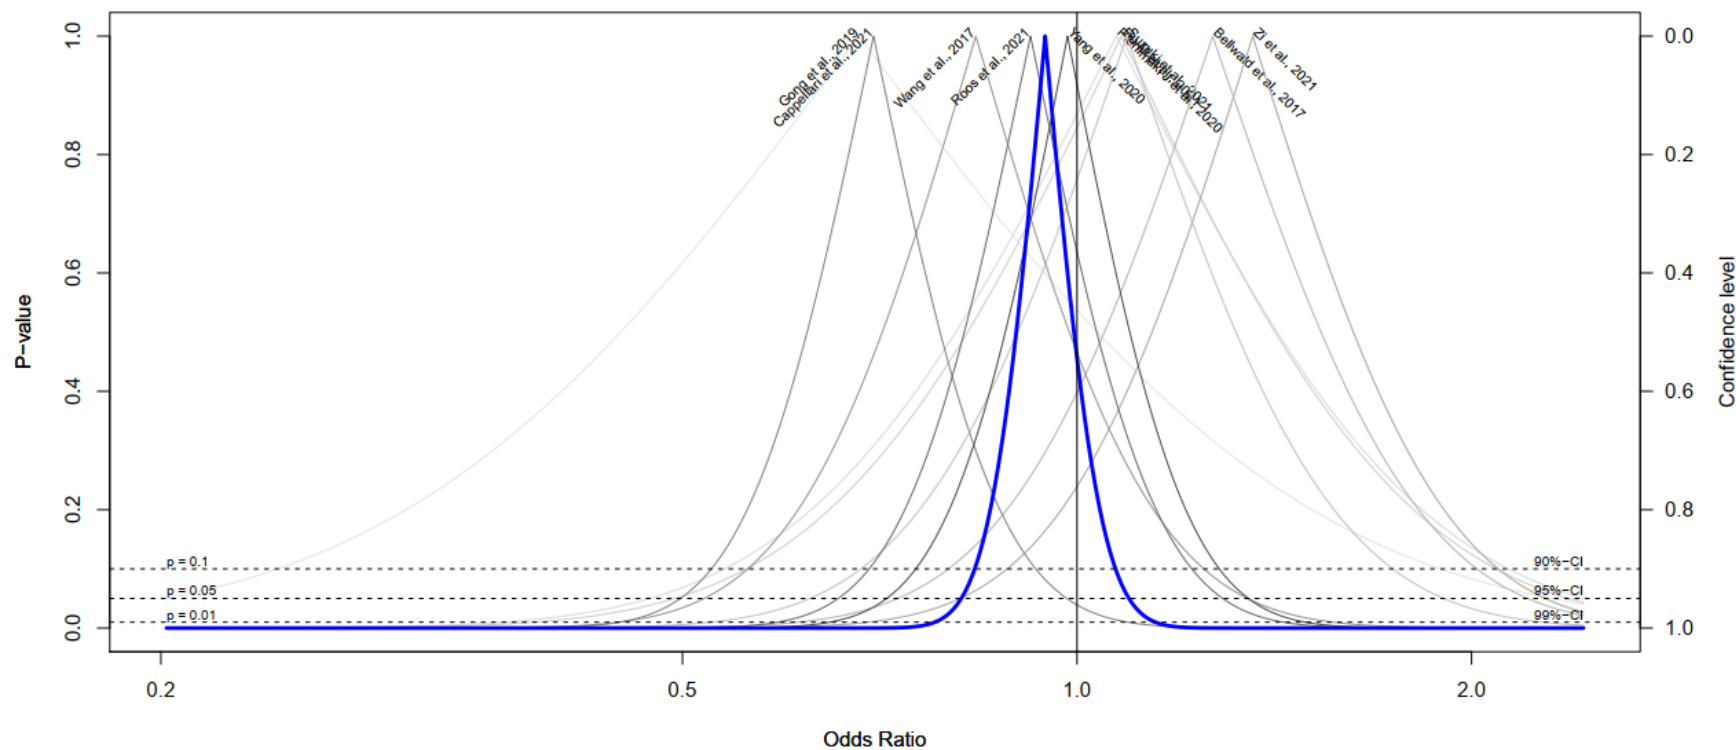

**Figure S6.** Drapery plot of comparison of successful reperfusion rate between direct mechanical thrombectomy and bridge therapy in the anterior group.

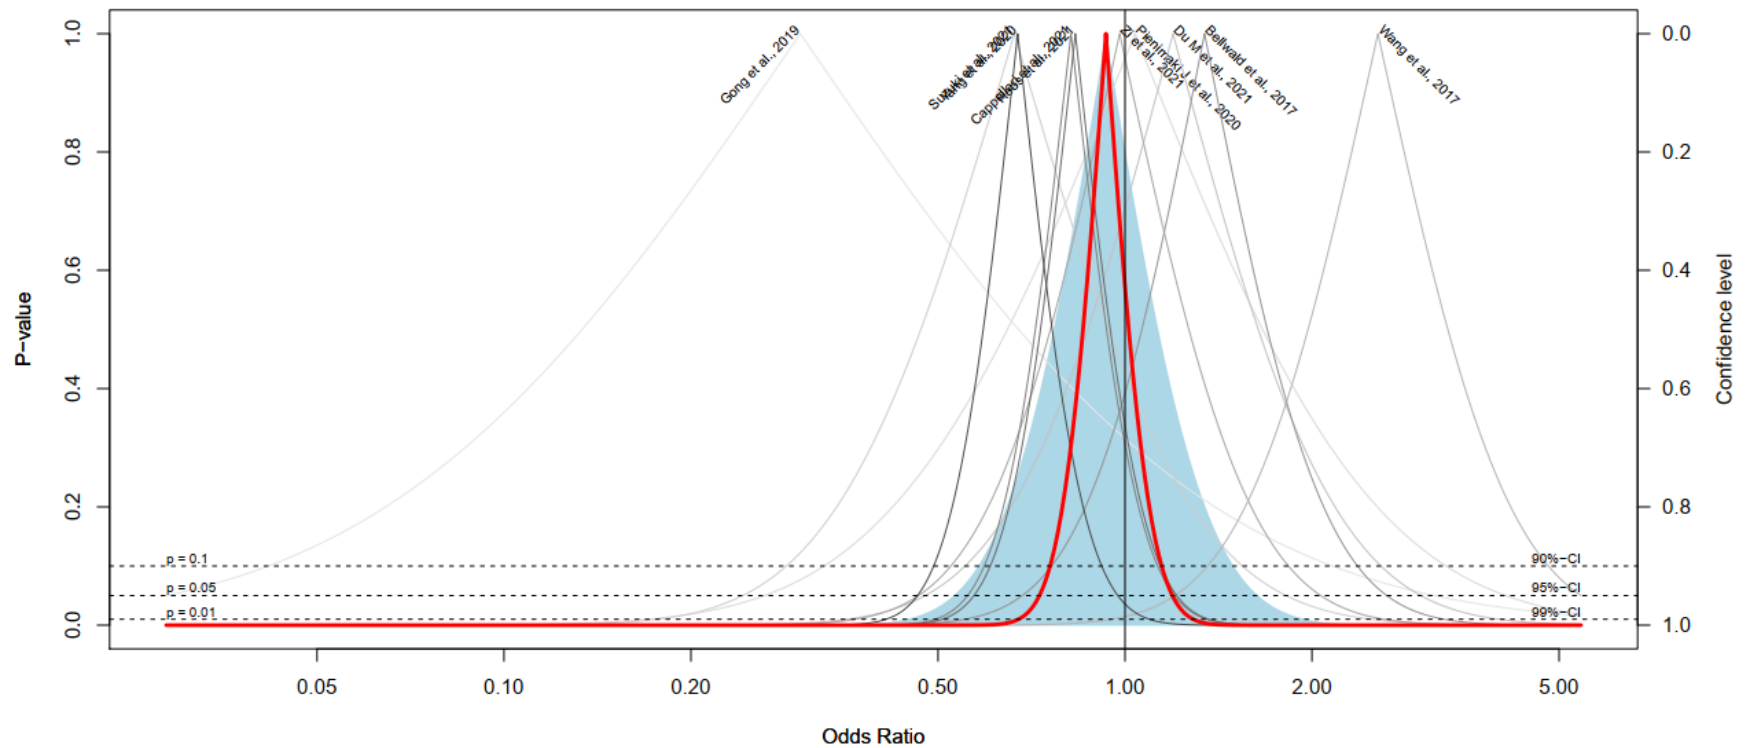



**Figure S7.** Drapery plot of comparison of sICH between direct mechanical thrombectomy and bridge therapy in the combined group.

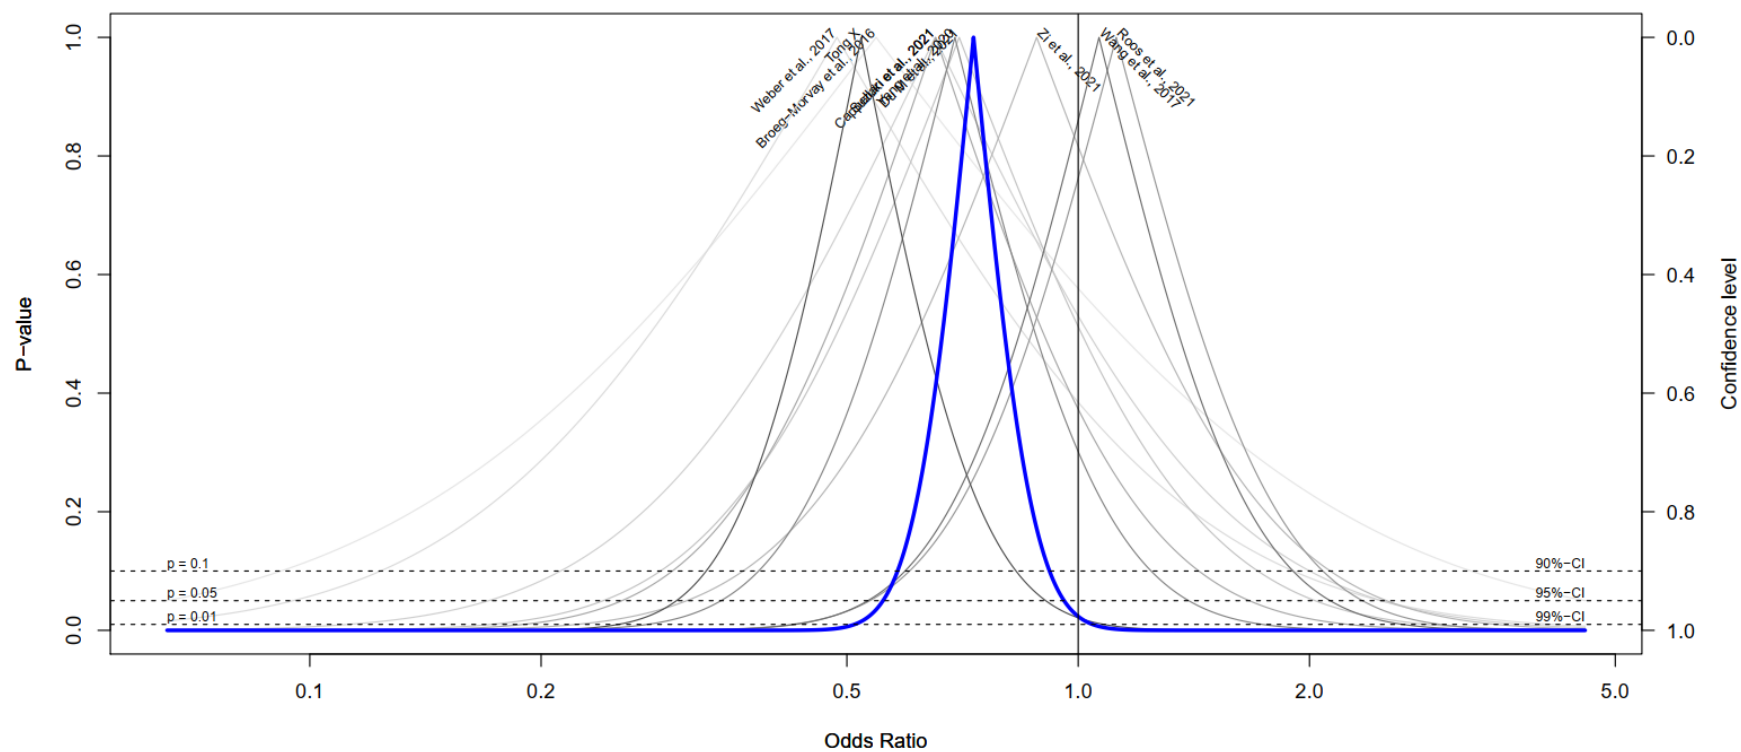

**Figure S8.** Drapery plot of comparison of mortality at 90 days between direct mechanical thrombectomy and bridge therapy in the combined group.

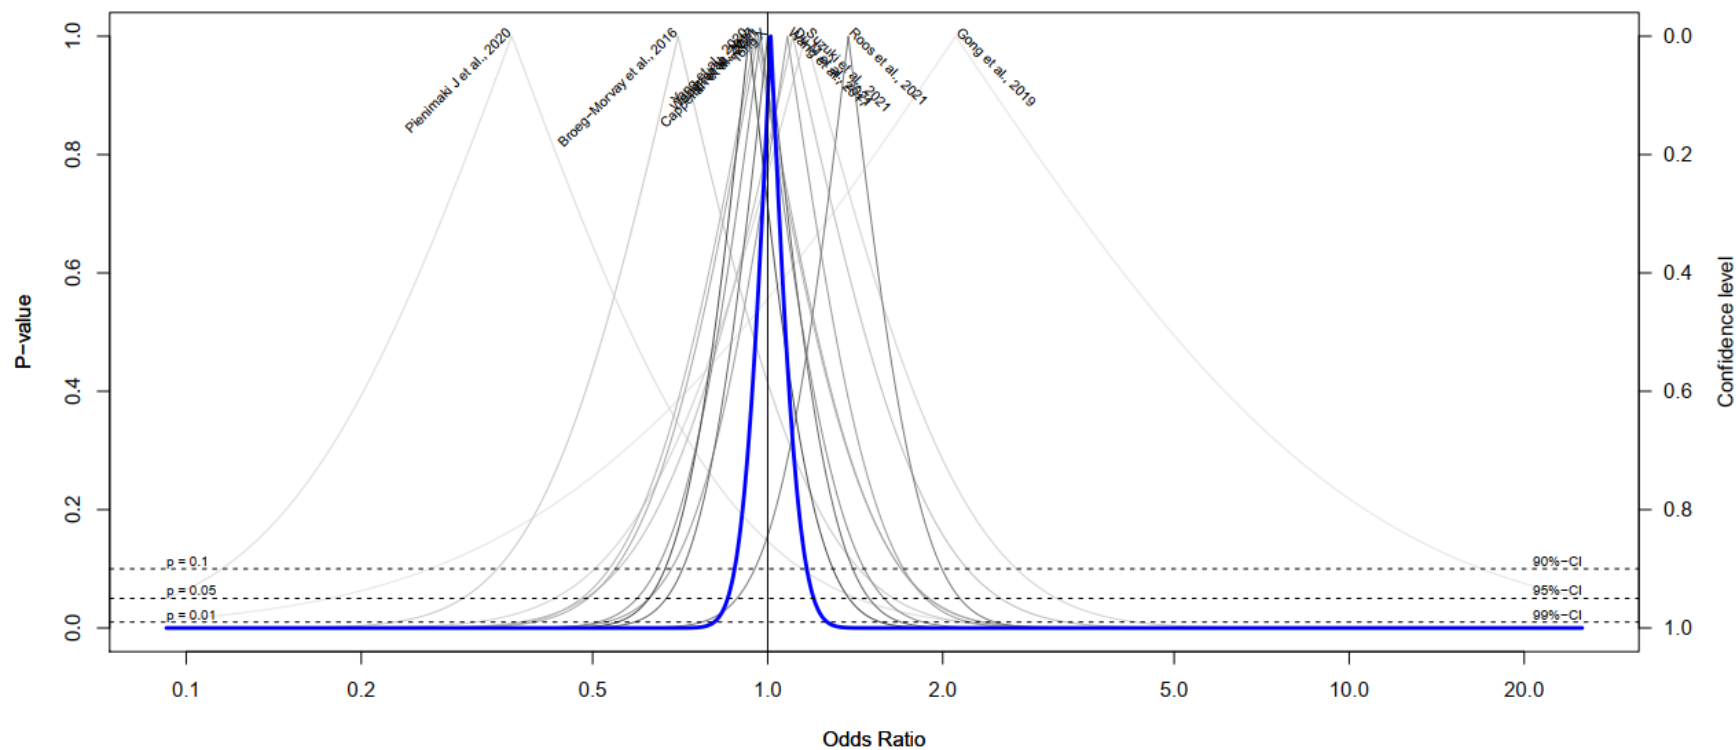

**Figure S9.** Drapery plot of comparison of good functional outcome at 90 days between direct mechanical thrombectomy and bridge therapy in the combined group.

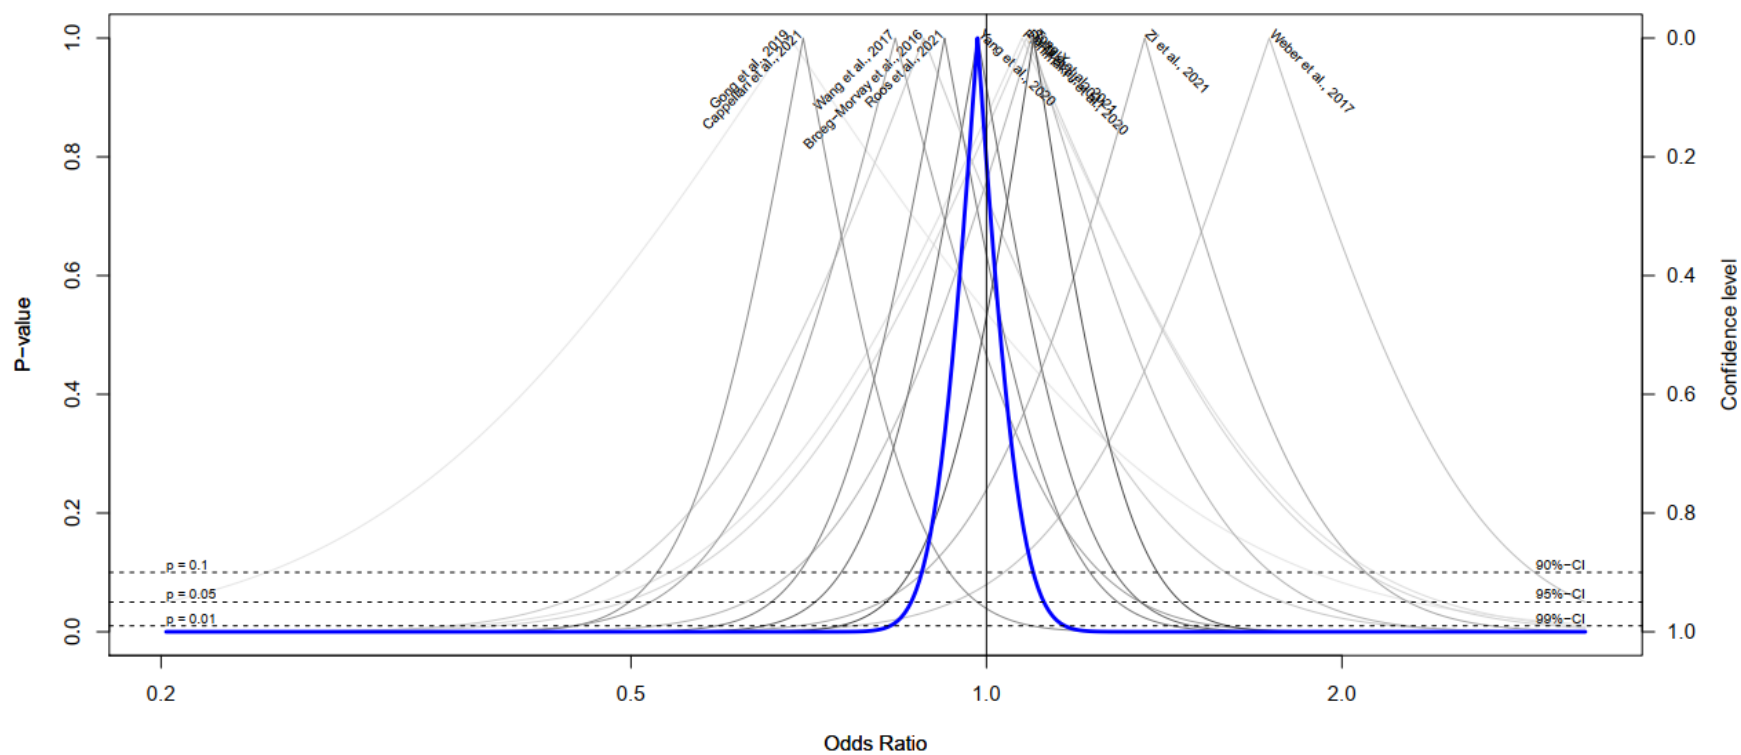

**Figure S10.** Drapery plot of comparison of successful reperfusion rate between direct mechanical thrombectomy and bridge therapy in the combined group.

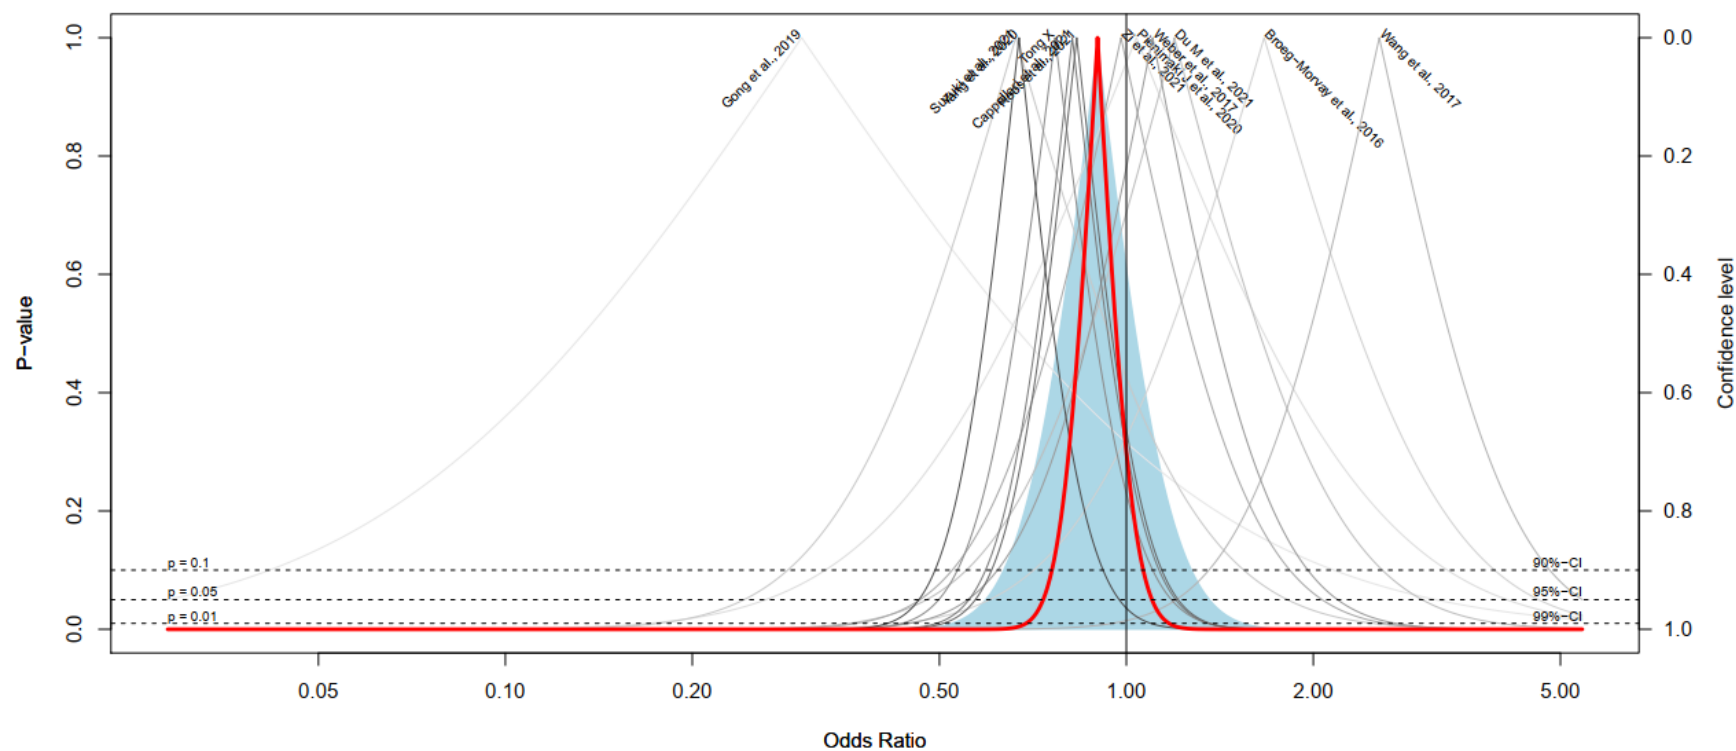

**Figure S11.** Funnel plots of comparison of sICH rate between direct mechanical thrombectomy and bridge therapy in the combined and anterior groups.

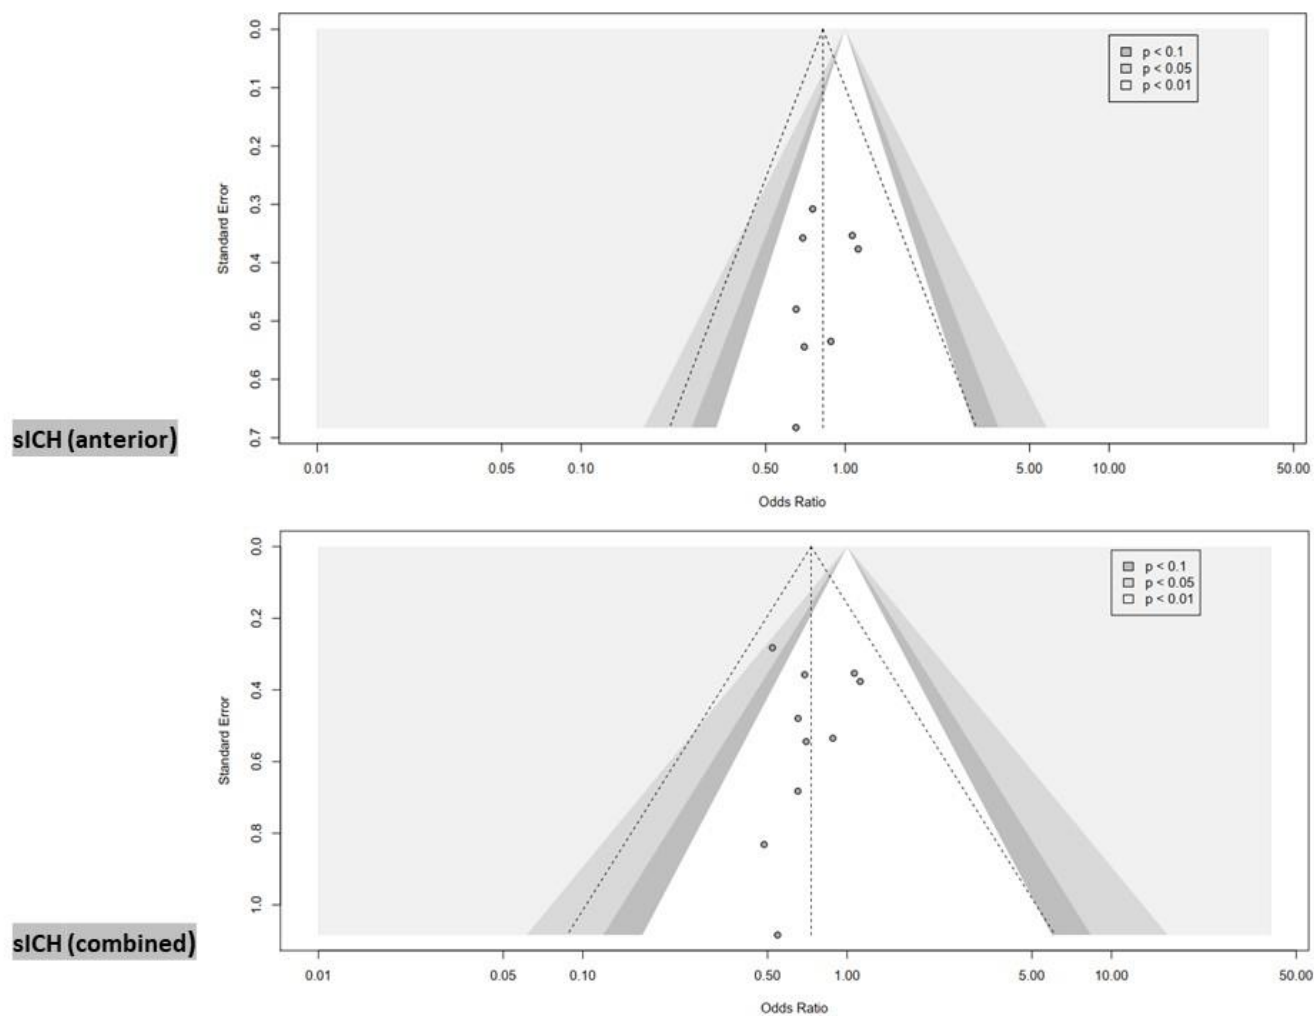

**Figure S12.** Funnel plots of comparison of mortality at 90 days between direct mechanical thrombectomy and bridge therapy in the combined and anterior groups.

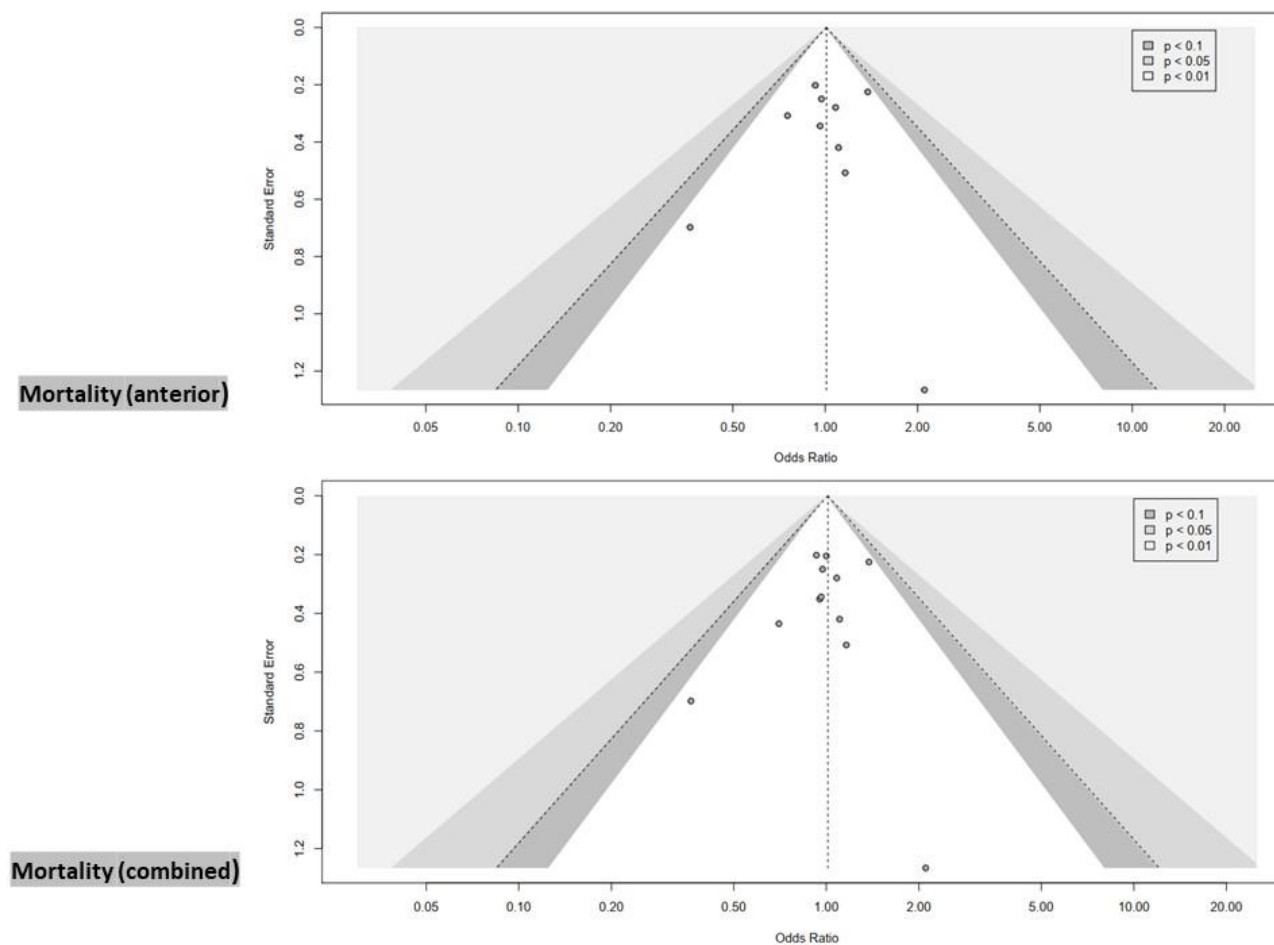

**Figure S13.** Funnel plots of comparison of good functional outcome at 90 days between direct mechanical thrombectomy and bridge therapy in the combined and anterior groups.

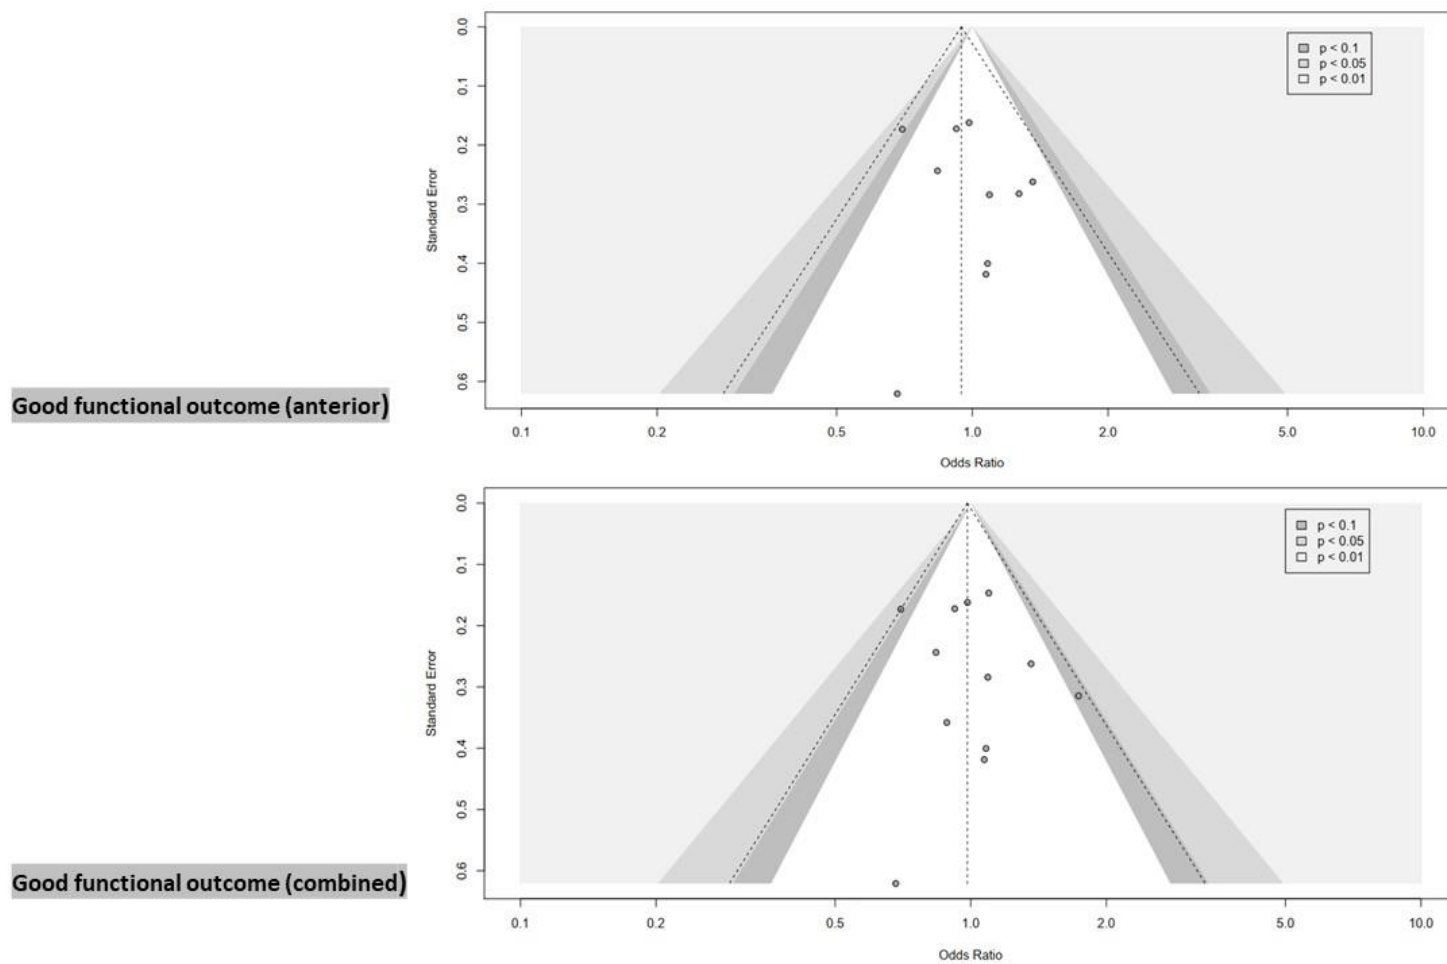

**Figure S14.** Funnel plots of comparison of successful reperfusion rate between direct mechanical thrombectomy and bridge therapy in the combined and anterior groups.

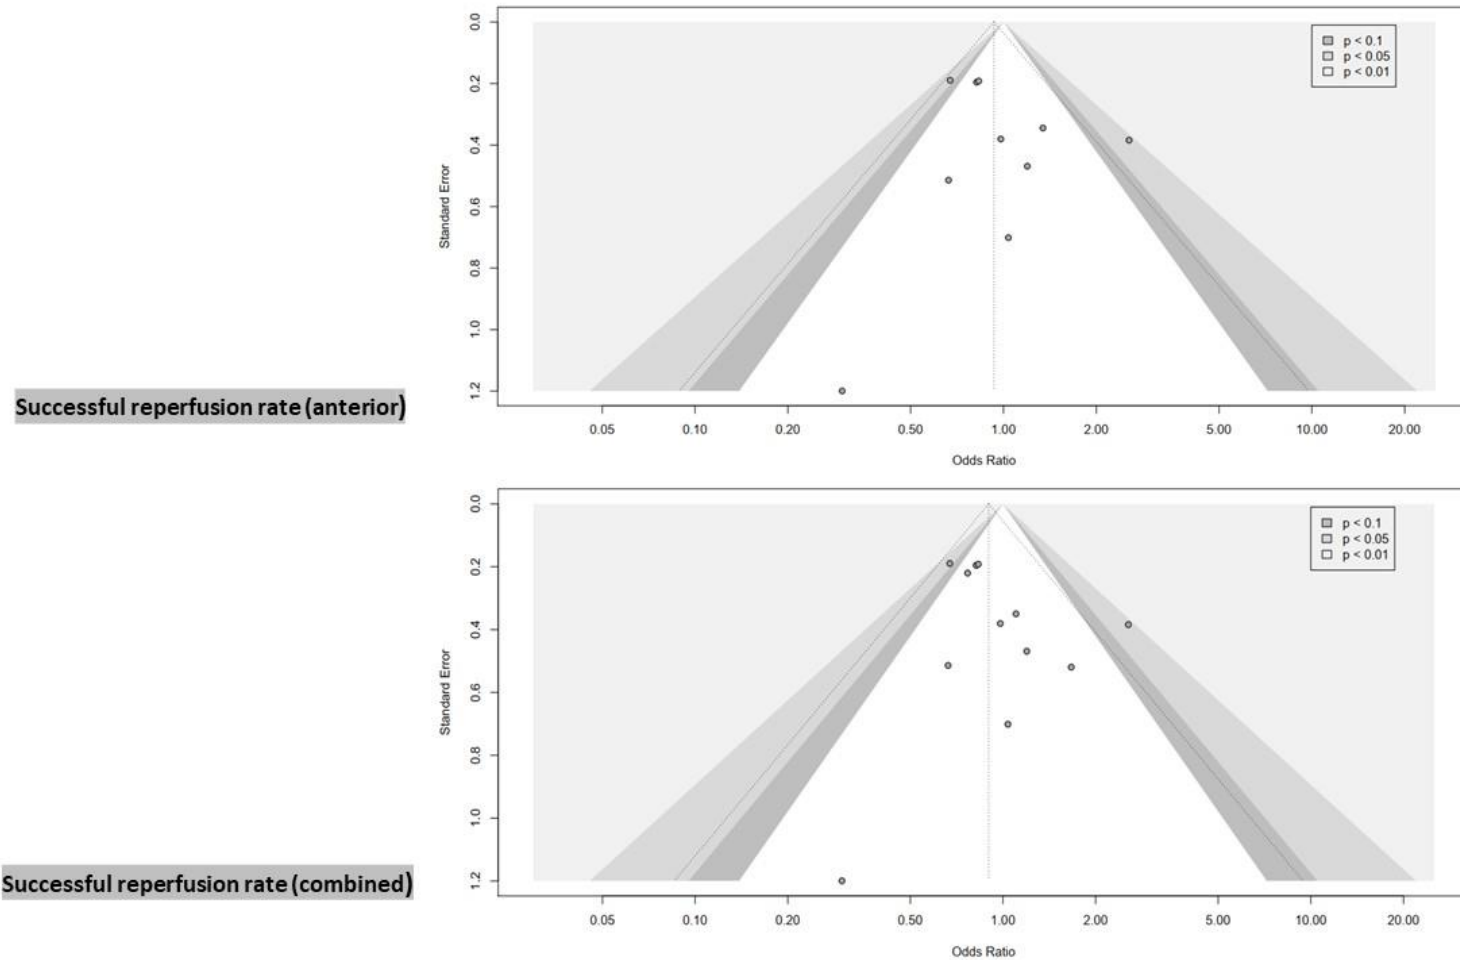

Supplement: s1 [file s1]
